# Supplementary material for: A biocompatible polypyrrole membrane for biomedical applications
Source: Royal Society of Chemistry journal article supplement (doi:10.1039/d1ra01338f), 2021-01-01
Supplement: d1ra01338f1.pdf [file d1ra01338f1.pdf]

## A biocompatible polypyrrole membrane for biomedical applications

Shujun Cui, <sup>abc</sup> Jifu Mao,<sup>d</sup> Mahmoud Rouabhia, <sup>a</sup> Saïd Elkoun<sup>e</sup> and Ze Zhang  <sup>\*bc</sup>

<sup>a</sup>Research Group on Oral Ecology, Faculty of Dentistry, Université Laval, Québec (QC), Canada

<sup>b</sup>Département de Chirurgie, Faculté de Médecine, Université Laval, Québec (QC), Canada

<sup>c</sup>Division of Regenerative Medicine, Research Center of CHU-Université Laval, Québec (QC), Canada

<sup>d</sup>Key Laboratory of Textile Science & Technology of Ministry of Education and College of Textiles, Donghua University, Shanghai, China

<sup>e</sup>Department of Mechanical Engineering, Université de Sherbrooke, Sherbrooke (QC), Canada

E-mail: [Ze.Zhang@chg.ulaval.ca](mailto:Ze.Zhang@chg.ulaval.ca); [Mahmoud.rouabhia@fmd.ulaval.ca](mailto:Mahmoud.rouabhia@fmd.ulaval.ca)

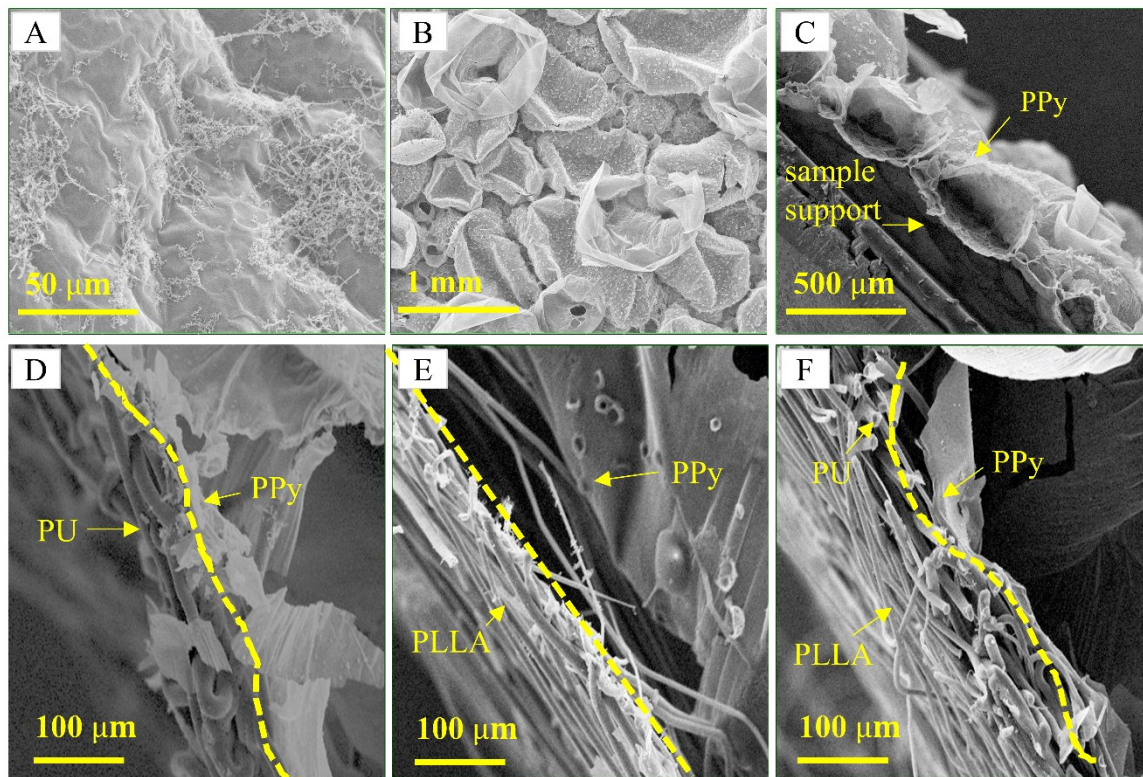

Fig. S1. SEM of the original PPy membrane (A, B, C) and the reinforced PPy membrane (D, E, F). A: nanotube side; B: bubble side; C: cross section (C); D: the good attachment of the compliant PU fibers to the PPy; E: the straight PLLA fibers detached from the membrane; and F: the integration of the composite fibers to the PPy surface (F).

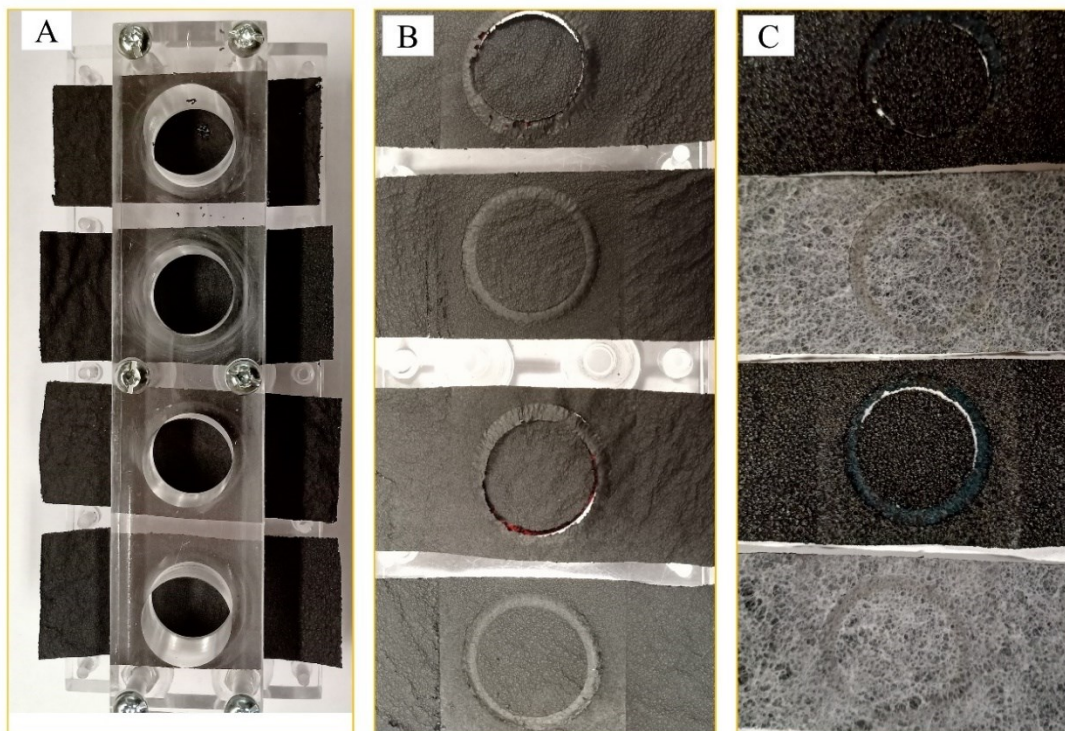

Fig. S2. Usability test of the PU/PLLA strengthened PPy membranes in comparison with the non-reinforced membranes, showing the intact reinforced membranes (2<sup>nd</sup> and 4<sup>th</sup> rows) and the broken non-reinforced membranes (1<sup>st</sup> and 3<sup>rd</sup> rows). A: Membranes assembled in the home-made cell culture device; B: Membranes disassembled from the cell culture device; C: Reverse side of the membranes. The white appearance of the 2 membranes in column C is because of the electrospun fibres.

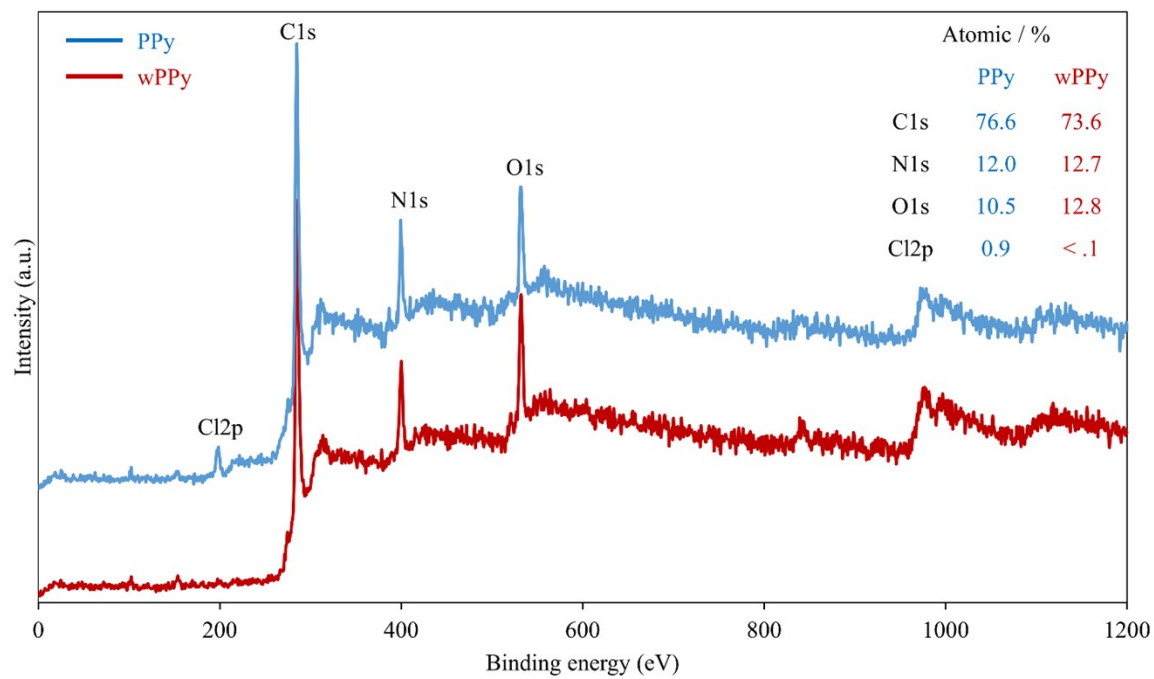

Fig. S3. XPS survey spectrum of PPy membrane before (PPy) and after wash (wPPy).
